# Supplementary material
Source: HighWire-hosted journal article supplement (https://bmjophth.bmj.com/content/5/1/e000525)

### NUMBER OF CONFIRMED COVID-19 CASES IN EACH COUNTRY DEPENDING ON THE OPHTHALMOLOGICAL SOCIETY

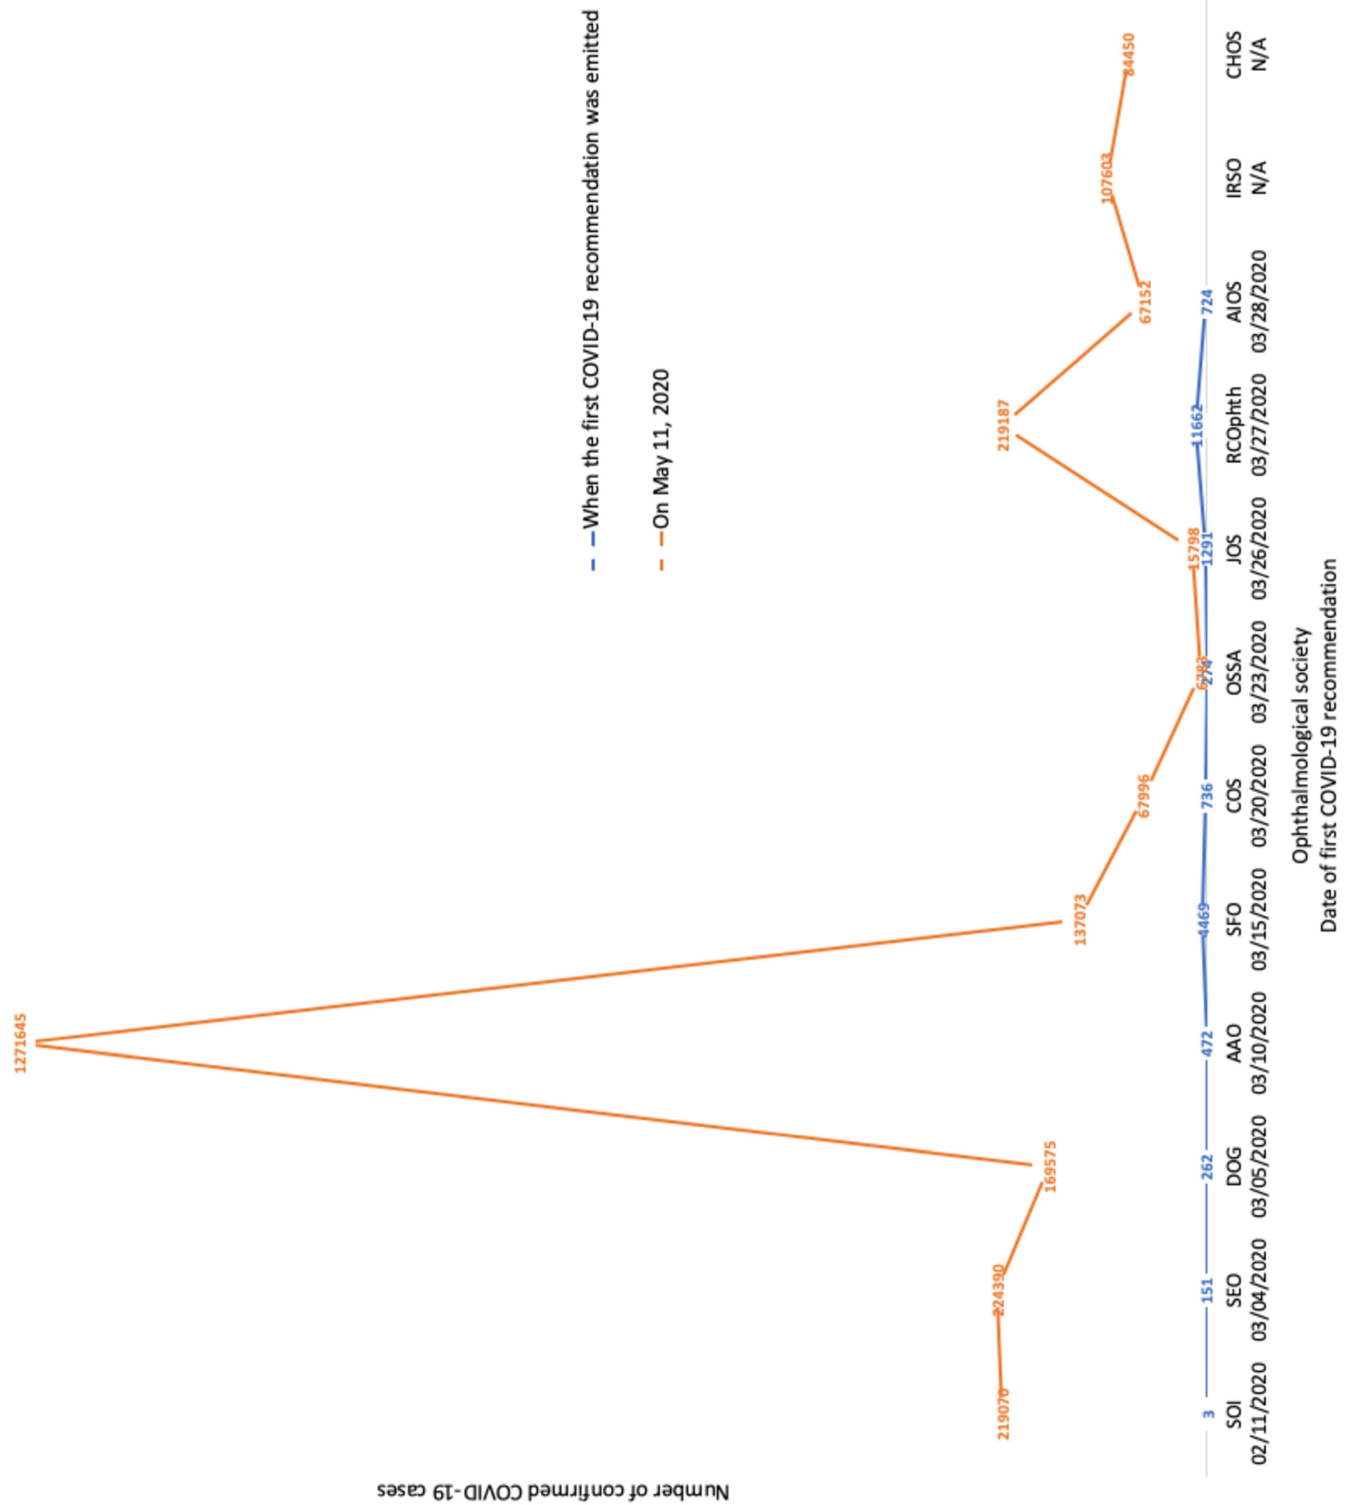

Supplement: inline-supplementary-material-2 [file inline-supplementary-material-2.pdf]
